# Supplementary material for: Tailorable multifunctionalities in ultrathin 2D Bi-based layered supercell structures
Source: Royal Society of Chemistry journal article supplement (doi:10.1039/d1nr04975e), 2021-01-01
Supplement: d1nr04975e1.pdf [file d1nr04975e1.pdf]

## Supplementary Information

### Tailorable multifunctionalities in ultrathin 2D Bi-based layered supercell structures

Zihao He<sup>a</sup>, Xingyao Gao<sup>b</sup>, Di Zhang<sup>b</sup>, Ping Lu<sup>c</sup>, Xuejing Wang<sup>b</sup>, Matias Kalaswad<sup>a</sup>, Bethany Rutherford<sup>b</sup>, Haiyan Wang<sup>a,b \*</sup>

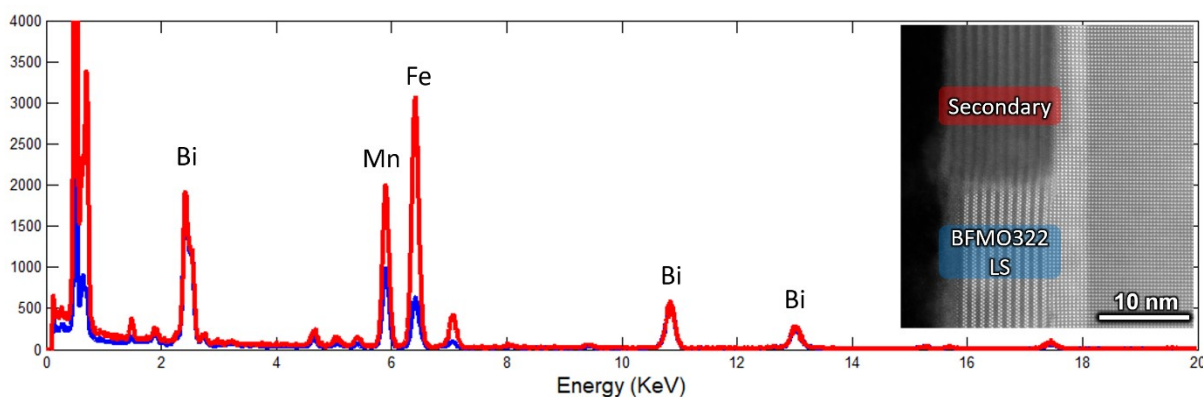

**Figure S1.** EDS spectra for the secondary phase (red line) and BFMO 322 LS (blue line), the inset presents the corresponding STEM image.

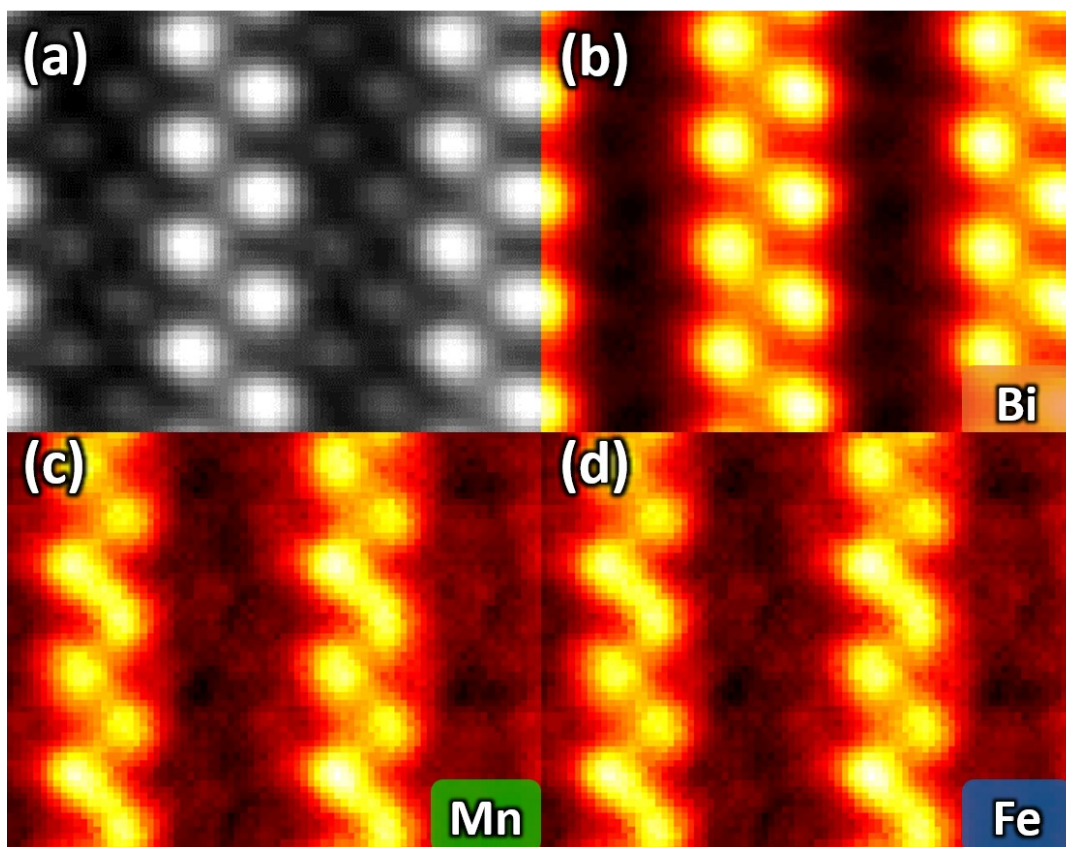

**Figure S2.** (a) HR-STEM image of BFMO322 LS structure. (b-d) Atomic resolution color EDS maps of Bi, Mn, and Fe atoms in the BFMO322 LS structure, identifying  $\text{Bi}_2\text{O}_2$  slabs and distorted  $\text{FeO}_6/\text{MnO}_6$  octahedra.

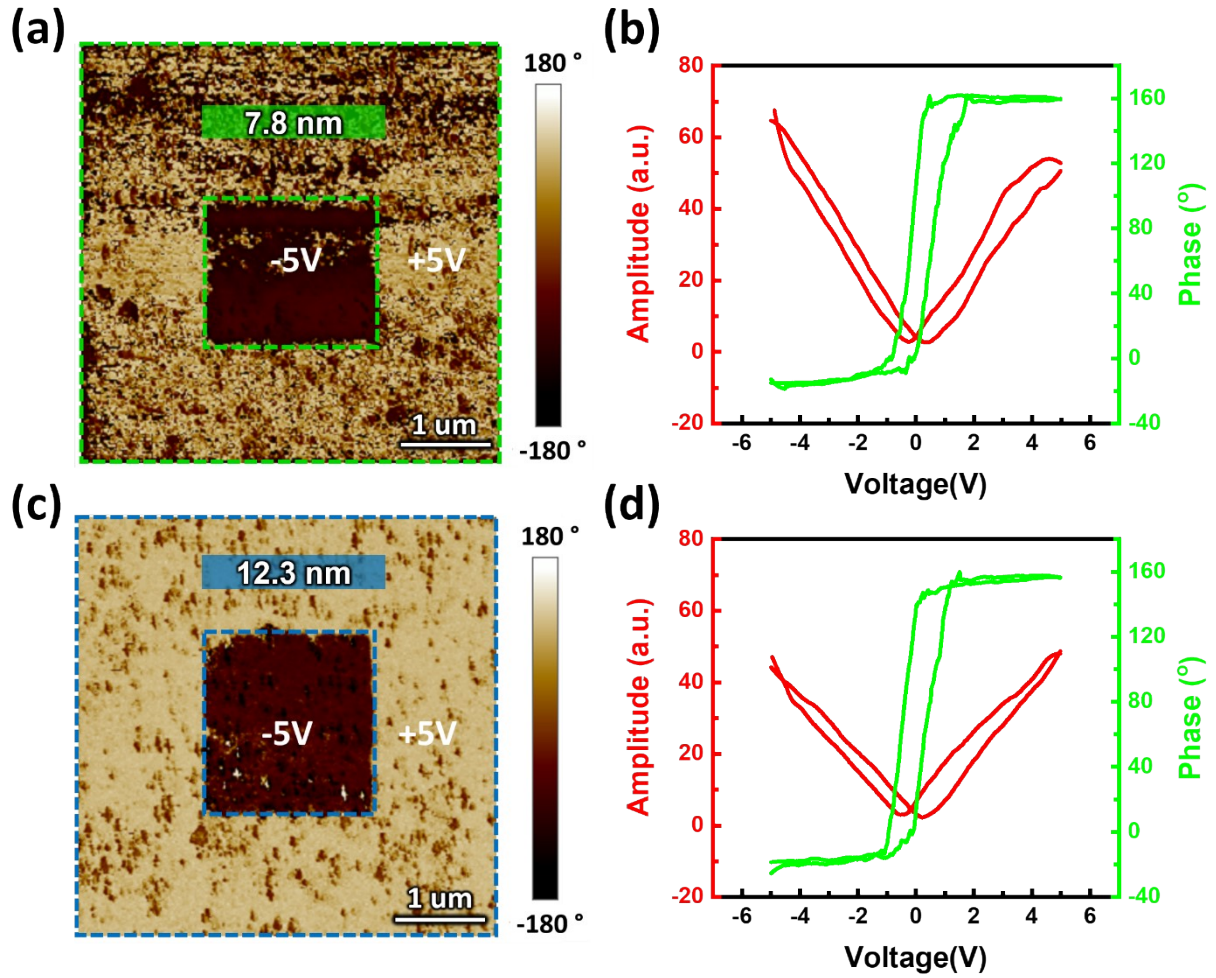

**Figure S3.** PFM vertical phase map of (a) 7.8 nm, and (c) 12.3 nm BFMO films after +5V writing over a  $5 \times 5 \mu\text{m}^2$  square box followed by -5V rewriting over a  $2 \times 2 \mu\text{m}^2$  central square box. The amplitude (red) and phase (green) switching curves of (b) 7.8 nm, and (d) 12.3 nm BFMO films as a function of bias voltage.

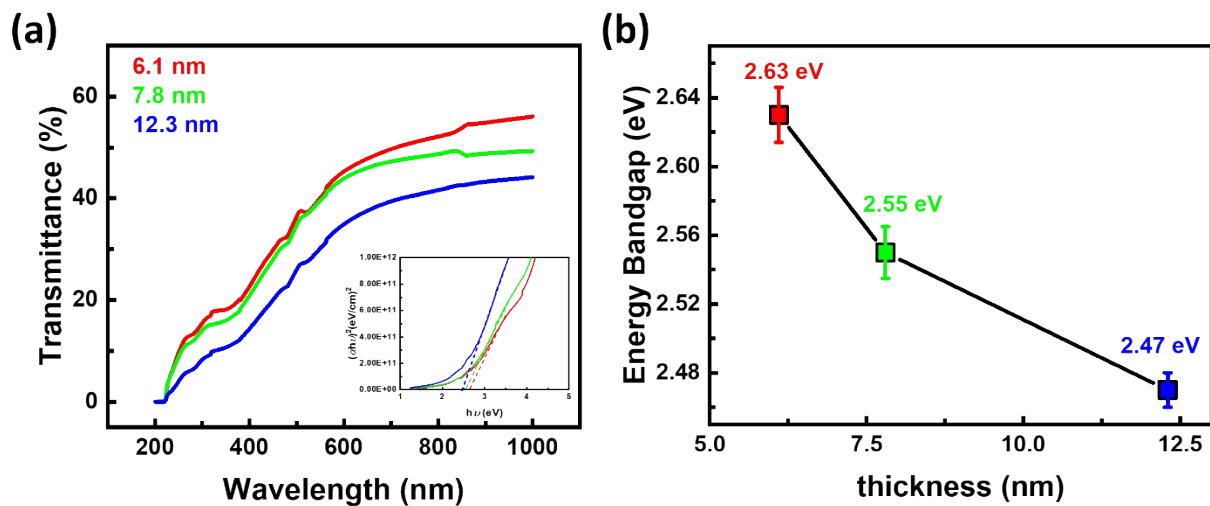

**Figure S4.** (a) The optical transmittance spectra of BFMO films with three different thicknesses as a function of wavelength. The inset shows the corresponding Tauc-plots. (b) direct band gaps of BFMO films as a function of film thickness.

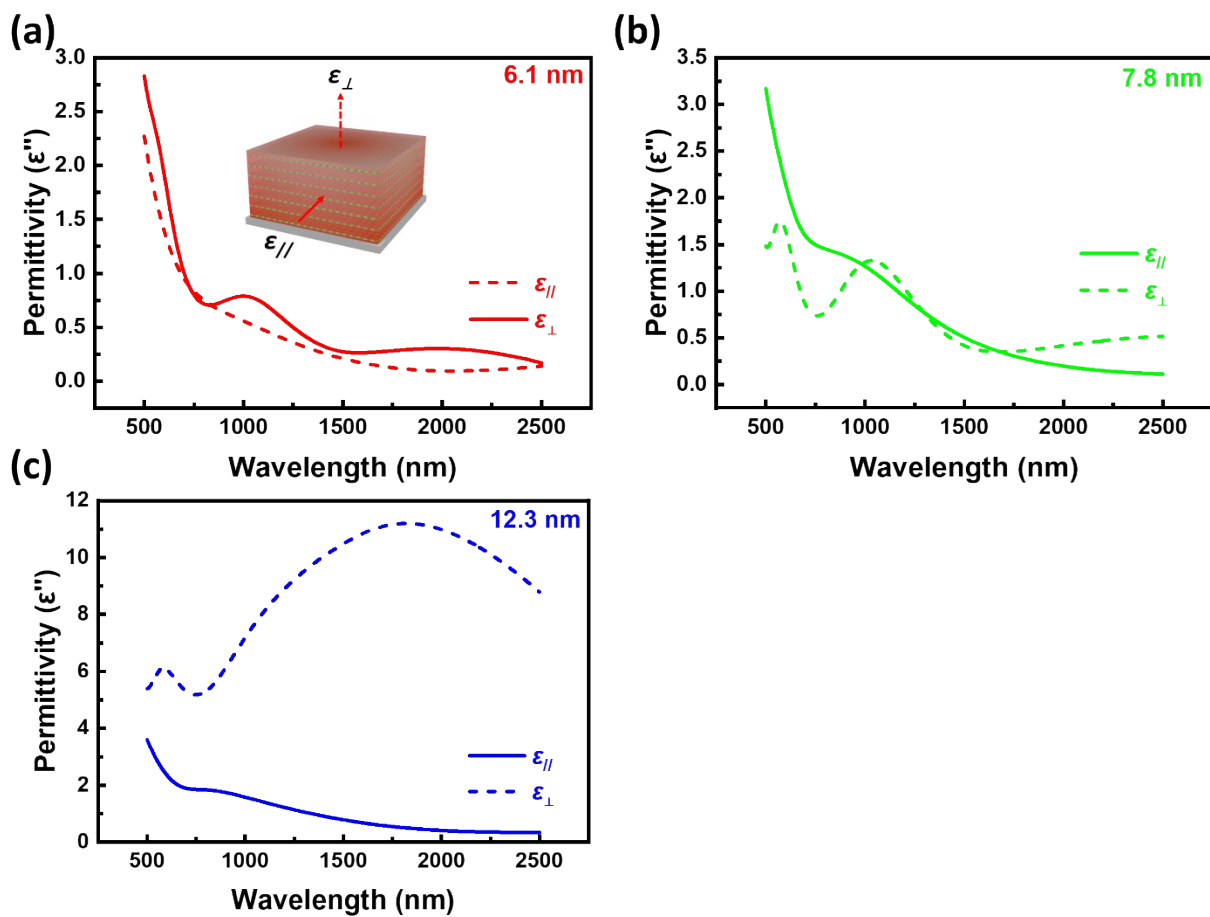

**Figure S5.** Imaginary part of the permittivity of (a) 6.1 nm, (b) 7.8 nm, and (c) 12.3 nm BFMO films in both IP (solid line) and OP (dashed line) directions.
